# Supplementary material for: Gut Microbiome Changes Elicited by Dietary Red Cabbage is Associated with Attenuation of High Fat Diet-Related Risk Factors in a Rodent Diet-Induced Obesity Model
Source: Preprints.org preprint supplement (doi:10.20944/preprints202312.1628.v1), 2023-12-21
Supplement: Supplementary file 2 [file supplementary]

Electronic Supplementary Information

**Red cabbage modulates composition and co-occurrence networks of gut microbiota in a rodent diet-induced obesity model**

Yanbei Wu 1, Mengmeng Xin 1, Quynhchi Pham 2, Yu Gao 1, Haiqiu Huang 3, Xiaojing Jiang 3, Robert W. Li 4, Liangli Yu 3, Yaguang Luo 5, Jing Wang 1, and Thomas T.Y. Wang 2,*

1 China-Canada Joint Lab of Food Nutrition and Health (Beijing), Beijing Technology &Business University, Beijing 100084, PR China

2 Diet Genomics and Immunology Laboratory, BHNRC, ARS, USDA, Beltsville, MD 20705, USA

3 Animal Parasitic Diseases Laboratory, BARC, ARS, USDA, Beltsville, MD 20705, USA

4 Department of Nutrition and Food Science, University of Maryland, College Park, MD 20742, USA

5 Food Quality Laboratory, BARC, ARS, USDA, Beltsville, MD 20705, USA

**Table S1.** Primer sequence used for microbial analysis by real-time PCR.

| **Bacteria** | **Direction** | **Sequence (5′–3′)** |
| --- | --- | --- |
| Bacteroidetes | Forward | GGARCATGTGGTTTAATTCGATGAT |
| Reverse | AGCTGACGACAACCATGCAG |
| Firmicutes | Forward | GGAGYATGTGGTTTAATTCGAAGCA |
| Reverse | AGCTGACGACAACCATGCAC |
| *Prevotella* | Forward | TCCTACGGGAGGCAGCAGT |
| Reverse | CAATCGGAGTTCTTCGTG |
| *Enterobacteriaceae* | Forward | CATTGACGTTACCCGCAGAAGAAGC |
| Reverse | CTCTACGAGACTCAAGCTTGC |
| *Ruminococcus* | Forward | GGCGGCCTACTGGGCTTT |
| Reverse | CCA GGT GGA TAA CTT ATT GTG TTAA |
| *Bifidobacteria* | Forward | TCGCGTCYGGTGTGAAAG |
| Reverse | CCACATCCAGCRTCCAC |
| *Lactobacillus* | Forward | GAGGCAGCAGTAGGGAATCTTC |
| Reverse | GGCCAGTTACTACCTCTATCCTTCTTC |
| *Akkermansia muciniphila* | Forward | CAGCACGTGAAGGTGGGGAC |
| Reverse | CCT TGCGGTTGGCTTCAGAT |

**Table S2.** Relative abundance (%) of the bacterial taxa at phylum level in cecal samples of mice grouped by diet (LF: LF diet, HF: HF diet, LFRC: LF diet supplemented with RC powder, HFRC: HF diet sup-plemented with RC powder).

| Phylum | Diet | | | |
| --- | --- | --- | --- | --- |
| LF | HF | LFRC | HFRC |
| Bacteroidetes | 60. 00±2. 45 | 53. 47±6. 21 | 47. 31±10. 30 | 42. 6±6. 53 |
| Firmicutes | 34. 41±2. 19 | 39. 19±5. 92 | 42. 17±11. 50 | 50. 58±7. 34 |
| Proteobacteria | 3. 18±0. 61 | 4. 78±0. 26 | 2. 57±0. 61 | 3. 81±0. 68 |
| Deferribacteres | 2. 17±0. 78 | 2. 38±1. 24 | 4. 06±1. 43 | 2. 93±1. 09 |
| TM7 | 0. 08±0. 04 | 0. 09±0. 11 | 0. 09±0. 09 | 0. 05±0. 04 |
| Actinobacteria | 0. 01±0. 00 | 0. 01±0. 00 | 0. 02±0. 01 | 0. 02±0. 01 |

**Table S3.** The topological properties of the global network are inferred by using the network pipeline based on random matrix theory (RMT) under various experimental conditions.

| **Network Indexes** | **LF** | **HF** | **LFRC** | **HFRC** |
| --- | --- | --- | --- | --- |
| Total nodes | 247 | 245 | 233 | 217 |
| Total links | 416 | 483 | 314 | 406 |
| Total modules | 23 | 23 | 38 | 27 |
| Modularity (M) | 0. 819 | 0. 72 | 0. 772 | 0. 704 |
| R square of power-law | 0. 71 | 0. 80 | 0. 818 | 0. 825 |
| Average degree (avgK) | 3. 368 | 3. 94 | 2. 695 | 3. 742 |
| Average clustering coefficient (avgCC) | 0. 304 | 0. 32 | 0. 145 | 0. 17 |
| Average path distance (GD) | 8. 217 | 6. 97 | 6. 603 | 4. 905 |
| Geodesic efficiency (E) | 0. 166 | 0. 20 | 0. 2 | 0. 261 |
| Harmonic geodesic distance (HD) | 6. 039 | 4. 92 | 4. 992 | 3. 826 |
| Maximal degree | 13 | 16 | 12 | 15 |
| Nodes with max degree | OTU 262625 | OTU 1136443  OTU 1684221  OTU 329790  OTU 317633 | OTU 263705 | OTU 336691 |
| Centralization of degree (CD) | 0. 039 | 0. 05 | 0. 04 | 0. 053 |
| Maximal betweenness | 6815. 31 | 4996. 26 | 3378. 541 | 2751. 546 |
| Nodes with max betweenness | OTU 262677 | OTU 275366 | OTU 275366 | OTU 339031 |
| Centralization of betweenness (CB) | 0. 204 | 0. 15 | 0. 114 | 0. 11 |
| Maximal stress centrality | 48167 | 33304 | 20539 | 31008 |
| Nodes with max stress centrality | 262677 | 418501 | 275366 | 339031 |
| Centralization of stress centrality (CS) | 1. 451 | 1. 04 | 0. 713 | 1. 262 |
| Maximal eigenvector centrality | 0. 355 | 0. 31 | 0. 435 | 0. 31 |
| Nodes with max eigenvector centrality | OTU 353012 | OTU 317633 | OTU 263705 | OTU 277208 |
| Centralization of eigenvector centrality (CE) | 0. 335 | 0. 28 | 0. 416 | 0. 279 |
| Density (D) | 0. 014 | 0. 02 | 0. 012 | 0. 017 |
| Reciprocity | 1. 00 | 1. 00 | 1. 00 | 1. 00 |
| Transitivity (Trans) | 0. 359 | 0. 35 | 0. 182 | 0. 214 |
| Connectedness (Con) | 0. 78 | 0. 63 | 0. 515 | 0. 481 |
| Efficiency | 0. 987 | 0. 98 | 0. 985 | 0. 972 |
| Hierarchy | 0. 00 | 0. 00 | 0. 00 | 0. 00 |
| Lubness | 1. 00 | 1. 00 | 1. 00 | 1. 00 |


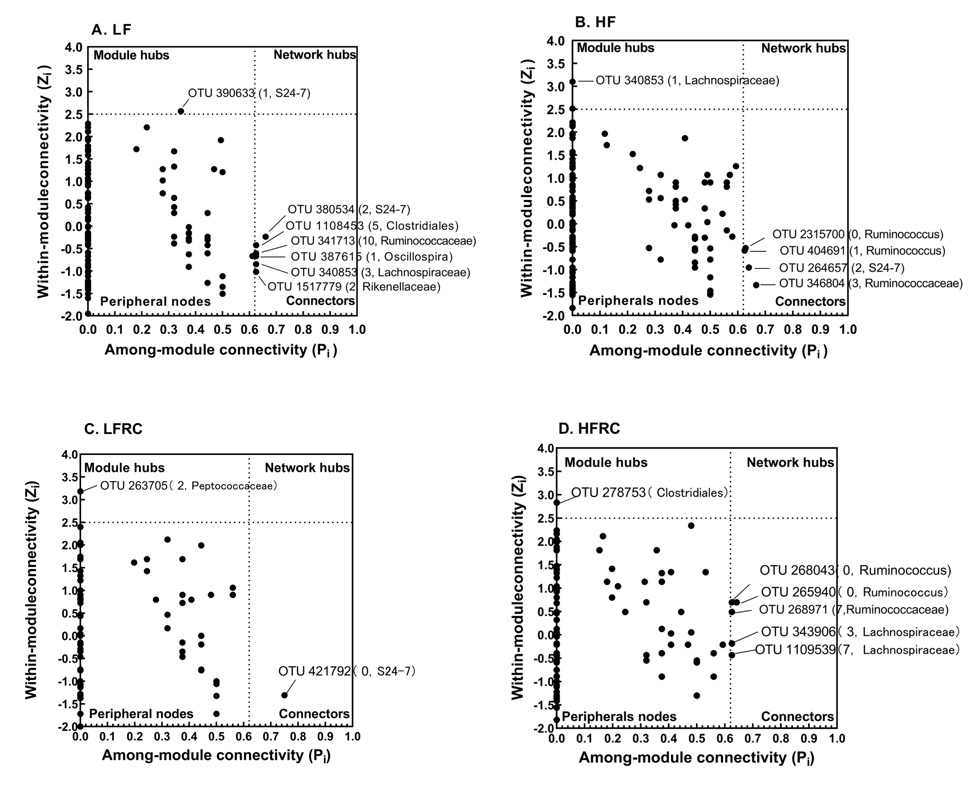


**Fig. S1.** The Zi-Pi diagram shows the distribution of the topological role of OTU in the network. Each point represents an OTU under different dietary groups (LF: LF diet, HF: HF diet, LFRC: LF diet with RC powder, HFRC: HF diet with RC powder). According to the scatter diagram of in-tra-module connectivity (Zi) and inter-module connectivity (Pi), the topological function of each OTU is determined. The module hub and connector are marked with OTU number. In parentheses are the module number and phylogenetic associations
